# Supplementary material for: PDIA3P1 promotes Temozolomide resistance in glioblastoma by inhibiting C/EBPβ degradation to facilitate proneural-to-mesenchymal transition
Source: J Exp Clin Cancer Res. 2022 Jul 15;41:223. doi: 10.1186/s13046-022-02431-0 (PMC9284800; doi:10.1186/s13046-022-02431-0)
Supplement: Supplementary file 2 — Additional file 2: Table S1. The information of DEGs between TMZ resistant cell lines and TMZ sensitive cell lines. Table S2. The Results of GSVA. Table S3. The Results of ssGSEA for Tumor Immune Infiltration Analysis. Table S4. Mass spectrometry result of proteins related to PDIA3P1. [file 13046_2022_2431_MOESM2_ESM.xlsx]

## Sheet: Supplementary Table S1
Table S1. The information of DEGs between TMZ resistant cell lines and TMZ sensitive cell lines
ID	R	S	baseMean	log2FoldChange	pvalue	padj
ENSG00000005187.7	10.567	61.262	35.915	-2.537	0.0001171	0.02202
ENSG00000016082.10	2.48	49.568	26.024	-4.32	0.0002985	0.04052
ENSG00000025708.8	404.585	40.96	222.772	3.3	2.267e-06	0.001151
ENSG00000050344.8	7516.98	1183.57	4350.27	2.667	0.0003138	0.04171
ENSG00000057704.6	1456.27	31.828	744.048	5.512	7.17e-07	0.000479
ENSG00000069482.6	29.251	3.104	16.177	3.268	0.0003173	0.04173
ENSG00000082293.8	38.539	1277.6	658.07	-5.051	0.0004253	0.04975
ENSG00000082397.11	3445.93	25.318	1735.62	7.094	3.24e-08	5.662e-05
ENSG00000084674.9	1.627	28.376	15.002	-4.107	1.744e-08	4.131e-05
ENSG00000086696.6	13.741	488.196	250.968	-5.148	0.0001101	0.02118
ENSG00000089472.12	4359.24	14.85	2187.05	8.209	1.79e-08	4.131e-05
ENSG00000090382.2	132.008	12.172	72.09	3.466	0.0001824	0.02931
ENSG00000100473.11	165.643	8.331	86.987	4.339	0.0001079	0.02091
ENSG00000102271.9	1321.99	102.778	712.387	3.688	0.0001401	0.02489
ENSG00000102468.6	399.212	6.124	202.668	6.049	3.271e-05	0.00928
ENSG00000102837.6	12.553	0.673	6.613	4.746	0.0003333	0.04245
ENSG00000103316.6	276.454	3.258	139.856	6.399	9.938e-06	0.003553
ENSG00000103355.8	41.763	2.37	22.067	4.223	0.0001013	0.02028
ENSG00000103742.7	1305.95	51.6	678.776	4.668	2.195e-07	0.000199
ENSG00000104055.10	93.287	2.972	48.13	5.055	1.123e-06	0.000679
ENSG00000104833.6	700.143	68.025	384.084	3.364	0.0003748	0.04531
ENSG00000106538.5	2047.59	28.98	1038.29	6.15	6.076e-07	0.0004407
ENSG00000106819.7	343.208	8.229	175.719	5.373	9.25e-05	0.01938
ENSG00000107731.8	1848.94	123.387	986.163	3.909	8.031e-05	0.01788
ENSG00000109956.8	956.485	7.553	482.019	6.998	6.712e-05	0.01654
ENSG00000110484.6	1.981	17.539	9.76	-3.168	0.0001234	0.02303
ENSG00000111335.8	14662.8	538.569	7600.7	4.767	0.0001743	0.02875
ENSG00000115085.9	10.321	51.451	30.886	-2.319	0.0002969	0.04052
ENSG00000116183.6	325.887	10.393	168.14	4.972	2.159e-06	0.001119
ENSG00000119866.16	14.632	95.449	55.041	-2.709	0.0001436	0.02515
ENSG00000120738.7	10101.4	47937.1	29019.2	-2.247	7.242e-05	0.01701
ENSG00000120915.9	146.601	17.847	82.224	3.037	0.0002009	0.03072
ENSG00000121871.3	2.047	57.02	29.534	-4.804	0.0002742	0.03819
ENSG00000123572.12	1.367	48.804	25.086	-5.164	0.0003162	0.04173
ENSG00000124225.11	27105.5	2803.9	14954.7	3.273	0.0003354	0.04245
ENSG00000126562.12	73.244	1849.1	961.17	-4.658	3.29e-05	0.00928
ENSG00000126709.10	74323.6	3197.15	38760.4	4.539	7.159e-05	0.01699
ENSG00000128052.8	1881.69	44.475	963.082	5.408	2.098e-05	0.006495
ENSG00000128683.9	1795.87	194.553	995.21	3.206	7.986e-05	0.01788
ENSG00000129244.4	20.855	402.48	211.667	-4.271	0.0003514	0.04318
ENSG00000129270.11	171.116	4.883	87.999	5.119	1.758e-07	0.0001785
ENSG00000129988.5	12113.7	41.063	6077.36	8.208	6.198e-05	0.01573
ENSG00000130720.8	4361.18	223.912	2292.55	4.283	0.0001822	0.02931
ENSG00000132561.9	21139.1	1369.13	11254.1	3.949	0.0001546	0.02669
ENSG00000132622.6	27.873	188.722	108.298	-2.758	0.0004015	0.04741
ENSG00000132854.14	180.946	2.562	91.754	6.135	1.567e-05	0.005205
ENSG00000134321.7	4186.94	52.283	2119.61	6.324	3.138e-06	0.001475
ENSG00000134326.7	1542.36	92.234	817.298	4.066	0.0003772	0.04538
ENSG00000135063.13	222.951	5.133	114.042	5.45	9.745e-06	0.003534
ENSG00000135114.8	4115.08	150.635	2132.86	4.772	4.781e-05	0.01305
ENSG00000135124.10	3154.83	818.433	1986.63	1.946	0.0003214	0.04206
ENSG00000136689.14	20.256	2.693	11.474	2.918	0.0001283	0.02361
ENSG00000136696.6	719.976	1.549	360.762	8.853	0.0002753	0.03819
ENSG00000136944.13	97.166	4.412	50.789	4.472	0.0003521	0.04318
ENSG00000137462.6	9.808	94.416	52.112	-3.257	1.393e-07	0.0001608
ENSG00000137474.15	14.057	361.159	187.608	-4.684	2.503e-05	0.007499
ENSG00000137841.7	58.162	329.545	193.853	-2.502	0.0002006	0.03072
ENSG00000137877.8	2411.1	215.229	1313.16	3.485	5.553e-05	0.0146
ENSG00000137959.11	16323.3	541.683	8432.49	4.913	1.399e-05	0.004737
ENSG00000138650.7	223.148	8138.01	4180.58	-5.188	2.833e-05	0.008172
ENSG00000139292.8	2730.26	57.896	1394.08	5.561	0.0002971	0.04052
ENSG00000139970.12	492.061	29.555	260.808	4.053	9.695e-06	0.003534
ENSG00000140798.11	1.417	31.379	16.398	-4.445	0.0001818	0.02931
ENSG00000141837.14	4380.15	113.937	2247.05	5.269	3.117e-08	5.662e-05
ENSG00000144115.12	274.018	9.676	141.847	4.835	2.842e-06	0.001414
ENSG00000145192.8	1.753	13.366	7.559	-2.985	5.678e-05	0.01471
ENSG00000147206.12	29.563	867.077	448.32	-4.874	0.0002005	0.03072
ENSG00000148488.11	52.936	3.978	28.457	3.762	3.346e-08	5.662e-05
ENSG00000149201.5	52.443	1187.36	619.901	-4.5	1.611e-05	0.005244
ENSG00000149294.12	6737.2	198.158	3467.68	5.089	3.959e-07	0.0003242
ENSG00000149516.9	8.302	0.337	4.319	4.721	6.424e-05	0.01615
ENSG00000150048.6	263.65	1.846	132.748	7.137	7.39e-06	0.003111
ENSG00000150594.5	410.783	8.883	209.833	5.543	9.136e-06	0.003422
ENSG00000152092.11	2237.59	7.998	1122.79	8.126	1.885e-07	0.000184
ENSG00000152208.7	0.184	162.436	81.31	-9.452	1.421e-09	6.011e-06
ENSG00000152726.14	36.929	798.793	417.861	-4.435	0.0002394	0.03453
ENSG00000153012.7	442.569	6.591	224.58	6.09	2.033e-05	0.006451
ENSG00000153253.11	147.331	3385.84	1766.59	-4.522	9.126e-06	0.003422
ENSG00000154646.4	3.729	313.103	158.416	-6.393	6.393e-08	9.547e-05
ENSG00000154856.8	1584.73	21.064	802.896	6.242	7.03e-08	9.915e-05
ENSG00000157601.9	26689	726.286	13707.6	5.2	2.093e-05	0.006495
ENSG00000162490.6	1234.76	54.971	644.867	4.496	2.046e-08	4.328e-05
ENSG00000162493.12	2999.22	87.846	1543.53	5.095	0.0003959	0.04719
ENSG00000162670.8	1.395	147.953	74.674	-6.743	6.243e-08	9.547e-05
ENSG00000162849.11	6190.16	150.629	3170.39	5.361	1.04e-07	0.0001321
ENSG00000163121.5	145.046	8.132	76.589	4.144	0.0001015	0.02028
ENSG00000163288.9	3.2	203.358	103.279	-5.99	9.312e-05	0.01938
ENSG00000163631.12	5.866	66.692	36.279	-3.487	3.895e-13	4.943e-09
ENSG00000164120.9	17.674	483.027	250.35	-4.774	8.926e-05	0.01905
ENSG00000164220.6	442.953	20899.1	10671	-5.56	3.842e-06	0.001742
ENSG00000165105.9	1082.78	53.398	568.087	4.34	9.167e-06	0.003422
ENSG00000165474.5	178.809	23.122	100.966	2.968	0.0003442	0.04304
ENSG00000165694.5	102.575	2.594	52.584	5.294	7.956e-05	0.01788
ENSG00000165949.8	16810.7	225.141	8517.93	6.222	1.223e-05	0.004217
ENSG00000166407.9	159.127	4.575	81.851	5.112	8.854e-07	0.000565
ENSG00000166432.10	620.158	12.571	316.364	5.634	1.594e-07	0.000176
ENSG00000166825.9	6485.93	366.195	3426.06	4.146	1.666e-07	0.0001763
ENSG00000168004.5	92.896	6.37	49.633	3.888	0.000367	0.04458
ENSG00000168743.8	2788.23	98.995	1443.61	4.815	0.000304	0.04083
ENSG00000168961.12	1261.65	87.276	674.463	3.855	7.477e-06	0.003111
ENSG00000169245.4	372.858	1.848	187.353	7.635	1.897e-06	0.001003
ENSG00000169884.9	52.152	261.2	156.676	-2.325	0.000239	0.03453
ENSG00000170162.9	75.538	2.105	38.821	5.192	1.655e-06	0.0009134
ENSG00000171408.9	609.107	61.573	335.34	3.306	0.0002187	0.03247
ENSG00000171476.17	421.095	28.006	224.551	3.909	0.0003647	0.04451
ENSG00000172346.10	518.061	23.332	270.696	4.472	0.0001031	0.02044
ENSG00000173077.10	13.663	1.049	7.356	3.839	0.0003996	0.0474
ENSG00000173406.11	457.274	4.996	231.135	6.516	2.715e-05	0.007922
ENSG00000176998.3	58.489	3.237	30.863	4.16	9.021e-05	0.01908
ENSG00000177294.6	57.839	3.997	30.918	3.857	8.786e-05	0.01905
ENSG00000177757.1	85.664	21.839	53.752	1.995	3.691e-07	0.0003123
ENSG00000179344.12	22.978	2196.41	1109.69	-6.58	6.277e-07	0.0004426
ENSG00000179403.10	7005.14	203.201	3604.17	5.108	9.072e-06	0.003422
ENSG00000179772.6	170.891	2.153	86.522	6.336	1.038e-06	0.0006425
ENSG00000179776.13	523.777	8.984	266.38	5.866	0.0001298	0.0237
ENSG00000180574.3	548.911	148.703	348.807	1.886	0.0001121	0.02127
ENSG00000180867.9	1810.47	600.167	1205.32	1.594	1.711e-10	1.086e-06
ENSG00000181126.9	116.477	4.362	60.42	4.764	1.146e-05	0.004041
ENSG00000181291.5	140.867	3.026	71.946	5.588	0.0002178	0.03247
ENSG00000181524.6	935.398	335.604	635.501	1.481	9.408e-05	0.01942
ENSG00000182584.4	20.947	83.366	52.157	-1.992	0.0001339	0.02429
ENSG00000184261.4	21.002	1807.71	914.357	-6.427	2.007e-07	0.0001887
ENSG00000185247.10	14.937	2212.12	1113.53	-7.21	0.0001704	0.02875
ENSG00000185686.13	100.409	3426.34	1763.37	-5.093	6.825e-05	0.01666
ENSG00000188783.5	13016.7	107.544	6562.1	6.92	1.579e-05	0.005205
ENSG00000189052.6	68.618	4.887	36.752	3.788	3.414e-06	0.001576
ENSG00000189056.9	15.894	1295.29	655.591	-6.349	2.361e-07	0.0002067
ENSG00000189299.5	0.552	390.179	195.366	-9.492	5.176e-05	0.01398
ENSG00000189343.6	12286.5	31268.4	21777.4	-1.348	8.382e-05	0.0185
ENSG00000197083.7	16.33	632.622	324.476	-5.277	2.46e-05	0.007499
ENSG00000198075.5	0.971	25.148	13.059	-4.67	0.0002411	0.03458
ENSG00000198125.8	45.522	10.132	27.827	2.167	0.0002314	0.03404
ENSG00000198597.4	289.619	7.735	148.677	5.234	0.000302	0.04078
ENSG00000198681.5	26.264	5634.45	2830.36	-7.746	1.568e-06	0.0008844
ENSG00000198729.4	648.469	24.177	336.323	4.747	3.03e-06	0.001472
ENSG00000198797.6	43.341	0	21.671	7.688	8.902e-07	0.000565
ENSG00000205212.3	9.026	430.091	219.558	-5.576	0.0002723	0.03819
ENSG00000207405.1	13.423	50.855	32.139	-1.929	0.0002008	0.03072
ENSG00000211619.2	0	9.78	4.89	-5.987	4.393e-05	0.01212
ENSG00000211648.2	0	19.05	9.525	-6.945	1.218e-07	0.0001473
ENSG00000211651.2	0.368	38.941	19.655	-6.818	2.043e-11	1.729e-07
ENSG00000211666.2	1.179	19.515	10.347	-4.035	7.434e-05	0.01716
ENSG00000211669.2	0.361	38.941	19.651	-6.818	1.291e-08	3.642e-05
ENSG00000211895.3	8.342	100.057	54.2	-3.596	8.928e-05	0.01905
ENSG00000211904.2	0	6.65	3.325	-5.434	0.0001737	0.02875
ENSG00000213443.2	337.26	135.383	236.322	1.319	9.699e-05	0.01976
ENSG00000213500.3	30.871	9.72	20.295	1.662	6.086e-05	0.01561
ENSG00000219201.3	258.036	115.947	186.992	1.16	1.819e-05	0.005845
ENSG00000223849.1	38.078	9.259	23.669	2.016	0.0003508	0.04318
ENSG00000224569.3	7.026	0.337	3.681	4.477	0.000217	0.03247
ENSG00000225573.3	293.508	90.895	192.202	1.705	3.01e-09	9.55e-06
ENSG00000225851.1	16.824	0.377	8.6	5.17	0.0001476	0.02566
ENSG00000226383.1	0.333	73.6	36.967	-7.732	0.0002071	0.03129
ENSG00000226478.2	39.328	17.326	28.327	1.189	6.551e-05	0.01631
ENSG00000226508.1	31.268	0	15.634	7.216	4.591e-06	0.002045
ENSG00000227158.1	1.58	30.255	15.917	-4.264	0.0003076	0.0411
ENSG00000227359.1	8.073	45.229	26.651	-2.473	0.0001409	0.02489
ENSG00000228358.1	18.498	0.814	9.656	4.417	0.00019	0.03014
ENSG00000229807.5	25030.2	91.384	12560.8	8.099	6.747e-10	3.425e-06
ENSG00000230397.1	19.346	3.572	11.459	2.484	0.0001744	0.02875
ENSG00000230630.1	2.571	219.908	111.239	-6.428	0.0003235	0.04211
ENSG00000231686.1	64.363	25.35	44.856	1.348	5.578e-05	0.0146
ENSG00000232079.2	0.184	29.585	14.884	-6.991	1.162e-06	0.0006861
ENSG00000232238.1	1.152	8.416	4.784	-2.821	0.0002805	0.03871
ENSG00000232387.2	22.966	4.868	13.917	2.228	0.0001373	0.02472
ENSG00000232629.4	4.824	177.187	91.006	-5.206	0.0001956	0.03072
ENSG00000233762.2	740.191	363.921	552.056	1.024	8.711e-05	0.01905
ENSG00000234297.2	59.976	28.343	44.159	1.098	0.0002031	0.03088
ENSG00000234350.1	14.876	2.953	8.914	2.208	0.0001859	0.02968
ENSG00000235043.2	90.119	31.549	60.834	1.509	0.0003401	0.04274
ENSG00000235238.1	122.223	45.305	83.764	1.44	0.0002589	0.03671
ENSG00000236552.1	5527.17	2208.09	3867.63	1.324	1.217e-06	0.0007023
ENSG00000237161.3	139.323	25.628	82.475	2.449	0.0002716	0.03819
ENSG00000237991.2	221.596	48.128	134.862	2.204	4.802e-14	1.219e-09
ENSG00000238129.1	0.298	333.942	167.12	-10.081	0.0001057	0.0208
ENSG00000240602.3	6.498	162.344	84.421	-4.647	0.0003942	0.04719
ENSG00000241635.3	4.927	597.315	301.121	-6.919	7.833e-06	0.003156
ENSG00000242371.1	0.368	9.857	5.112	-4.85	0.0001412	0.02489
ENSG00000242515.1	4.231	168.208	86.219	-5.31	0.0003285	0.04245
ENSG00000243955.1	280.59	3.689	142.139	6.228	5.783e-06	0.002531
ENSG00000244313.2	1403.41	692.702	1048.06	1.02	3.756e-05	0.01048
ENSG00000244734.2	0	10.263	5.132	-6.061	9.029e-08	0.0001206
ENSG00000247416.2	74.099	1.34	37.72	5.79	2.168e-09	7.861e-06
ENSG00000248103.1	4.867	157.33	81.099	-5.015	9.73e-05	0.01976
ENSG00000249328.2	34.906	3.207	19.056	3.412	8.374e-06	0.003322
ENSG00000249958.1	0.367	19.205	9.786	-5.801	0.0002354	0.03435
ENSG00000250159.2	0.365	48.17	24.267	-7.122	2.511e-05	0.007499
ENSG00000251039.2	0	32.052	16.026	-7.69	5.177e-07	0.0003865
ENSG00000252699.1	2.982	14.049	8.516	-2.248	0.0004171	0.04902
ENSG00000253676.1	186.092	89.746	137.919	1.063	0.0003509	0.04318
ENSG00000253873.1	2397.03	52.39	1224.71	5.515	6.1e-06	0.002625
ENSG00000253898.1	1.662	102.276	51.969	-5.941	0.0001078	0.02091
ENSG00000254027.1	7.576	0	3.788	5.179	0.0001721	0.02875
ENSG00000254560.1	48.175	4.055	26.115	3.544	6.493e-07	0.0004455
ENSG00000256802.2	161.443	9.171	85.307	4.152	7.069e-05	0.01699
ENSG00000259070.1	593.676	25.706	309.691	4.533	0.000232	0.03404
ENSG00000259129.1	2.152	129.002	65.577	-5.886	2.698e-05	0.007922
ENSG00000260257.1	130.302	281.379	205.841	-1.112	0.0003323	0.04245
ENSG00000260409.1	52.566	0.337	26.451	7.389	5.163e-07	0.0003865
ENSG00000260918.1	2.973	196.497	99.735	-6.044	5.273e-05	0.01409
ENSG00000263934.2	2.633	75.698	39.166	-4.836	1.229e-05	0.004217
ENSG00000265717.1	0.184	48.319	24.252	-7.702	4.839e-07	0.0003839
ENSG00000266037.1	50.528	205.534	128.031	-2.025	0.0001244	0.02306
ENSG00000266050.2	40.275	0	20.138	7.581	1.694e-06	0.000915
ENSG00000266651.1	14.476	43.413	28.945	-1.6	7.113e-05	0.01699
ENSG00000266743.1	0	32.773	16.387	-7.717	7.82e-06	0.003156
ENSG00000266900.1	0.64	16.445	8.542	-4.626	0.0002551	0.03638
ENSG00000267497.1	12.586	1.3	6.943	3.424	0.0001651	0.02832
ENSG00000268894.2	10.118	202.271	106.194	-4.318	0.0001782	0.02918
ENSG00000272138.1	9.104	0.437	4.771	4.285	0.0003345	0.04245

## Sheet: Supplementary Table S2
Table S2. The Results of GSVA
Term	TCGA.14.0871.01A	TCGA.26.5134.01A	TCGA.06.0178.01A	TCGA.06.0139.01A	TCGA.12.3650.01A	TCGA.14.0736.02A	TCGA.32.1982.01A	TCGA.06.5417.01A	TCGA.06.0238.01A	TCGA.14.1829.01A	TCGA.41.2571.01A	TCGA.27.1831.01A	TCGA.06.0686.01A	TCGA.06.0138.01A	TCGA.14.1825.01A	TCGA.27.2524.01A	TCGA.06.0743.01A	TCGA.14.1402.02A	TCGA.06.0744.01A	TCGA.06.0168.01A	TCGA.12.1597.01B	TCGA.27.1837.01A	TCGA.12.0616.01A	TCGA.27.2526.01A	TCGA.32.4213.01A	TCGA.16.0846.01A	TCGA.06.2558.01A	TCGA.06.0129.01A	TCGA.28.1753.01A	TCGA.14.0790.01B	TCGA.06.0749.01A	TCGA.14.0817.01A	TCGA.06.0132.01A	TCGA.19.2620.01A	TCGA.06.0190.01A	TCGA.06.0221.02A	TCGA.06.2570.01A	TCGA.27.2521.01A	TCGA.27.1834.01A	TCGA.14.1034.01A	TCGA.06.0219.01A	TCGA.26.5135.01A	TCGA.26.5136.01B	TCGA.12.0618.01A	TCGA.06.0645.01A	TCGA.06.0882.01A	TCGA.02.2483.01A	TCGA.28.2513.01A	TCGA.06.0878.01A
GOBP_MITOCHONDRIAL_GENOME_MAINTENANCE	-0.598367	-0.501194	-0.242477	-0.619918	-0.312318	-0.548877	-0.688516	-0.527172	-0.0674466	-0.366714	-0.0921436	-0.243019	-0.397336	-0.295025	-0.62467	-0.340511	0.0843047	-0.110803	0.0198157	-0.646908	-0.358738	-0.566362	-0.412641	-0.248013	-0.569887	-0.248755	0.129256	0.477028	-0.494738	-0.227166	-0.421624	-0.141468	-0.460161	-0.621175	0.0649859	0.18207	0.44291	0.307912	-0.0500205	-0.311735	-0.198136	-0.208125	-0.523982	0.374523	-0.329013	0.0472526	0.415116	-0.449829	-0.547931
GOBP_SINGLE_STRAND_BREAK_REPAIR	-0.591564	-0.520408	-0.360936	-0.693194	-0.409832	-0.494467	-0.764744	-0.47357	-0.013568	-0.363868	-0.383827	-0.20466	-0.599371	-0.497142	-0.646912	-0.102147	-0.264983	-0.474637	-0.286988	-0.611159	-0.50265	-0.605264	-0.502702	-0.213148	-0.549936	-0.230969	0.541765	0.520539	-0.687396	-0.226359	-0.230175	-0.321141	-0.439505	-0.596891	-0.0114323	0.315294	0.234847	0.236702	0.112959	0.216811	-0.323083	-0.403777	-0.29498	0.342271	-0.0851445	-0.193898	0.384904	-0.312423	-0.587707
GOBP_REGULATION_OF_DNA_RECOMBINATION	-0.516222	-0.462658	-0.263155	-0.465096	-0.092166	-0.52352	-0.586269	-0.55	-0.164581	-0.317724	-0.404604	-0.32498	-0.534972	-0.371826	-0.492199	-0.183077	-0.182286	-0.310051	-0.0901804	-0.599779	-0.449041	-0.485111	-0.214355	-0.361752	-0.529447	-0.279577	0.062657	0.416756	-0.442079	-0.281658	-0.459218	-0.134103	-0.453591	-0.534465	0.170212	0.0904354	-0.00718277	0.0989705	-0.209408	0.299223	-0.268111	-0.224893	-0.427448	0.0582905	-0.15715	-0.192927	0.312375	-0.327701	-0.474931
GOBP_RIBOSOMAL_LARGE_SUBUNIT_ASSEMBLY	-0.502824	-0.697022	0.351668	-0.661816	-0.0146805	-0.486205	-0.668252	-0.576368	0.263424	0.000446732	0.102376	0.103248	-0.473142	-0.180358	-0.656925	0.573344	-0.224749	0.0260104	0.524104	-0.672549	0.193878	-0.688908	0.202894	0.563119	-0.619311	-0.429534	-0.138826	0.0754178	-0.665829	-0.401003	-0.321955	0.587947	-0.39469	-0.58073	-0.395539	-0.554201	0.319551	0.68078	-0.510275	-0.412334	0.186895	-0.00613502	-0.664808	0.245977	0.244847	-0.507743	0.667417	-0.285934	-0.700654
GOBP_RIBOSOMAL_SMALL_SUBUNIT_ASSEMBLY	-0.574089	-0.805706	0.676457	-0.491665	0.340976	0.125881	-0.516636	-0.656334	0.499171	0.600966	0.324439	0.687965	-0.511265	0.33935	-0.569657	0.649532	0.0411071	0.57903	0.594725	-0.56094	0.524435	-0.664544	0.581216	0.618378	-0.555143	-0.440566	-0.114468	-0.1591	-0.716987	-0.561711	0.329788	0.692742	-0.251849	-0.676973	0.0605508	-0.570893	0.37005	0.719203	-0.734667	-0.634303	0.625745	-0.165628	-0.790853	-0.0109059	0.293631	-0.430092	0.791347	0.0722243	-0.76451
GOBP_VERY_LONG_CHAIN_FATTY_ACID_METABOLIC_PROCESS	-0.498333	-0.515726	-0.1478	-0.387259	-0.353787	0.0853441	-0.511791	-0.520171	-0.0608544	0.00387618	-0.42295	0.255138	-0.430646	-0.257846	-0.504964	0.183114	-0.088505	0.230036	-0.288104	-0.282613	-0.02301	-0.448276	-0.516192	0.56586	-0.372708	0.283548	-0.135475	-0.424281	-0.46609	0.290943	0.324794	0.0771997	0.404921	0.067217	0.320728	-0.273177	-0.266626	-0.00291972	-0.116926	0.462664	0.349767	-0.435099	-0.500304	-0.346921	-0.179576	0.466784	-0.342607	0.37258	-0.56612
GOBP_TRANSITION_METAL_ION_TRANSPORT	-0.476956	-0.496145	-0.0357855	-0.154517	-0.362083	-0.0395998	-0.45398	-0.5027	-0.0542852	0.025659	-0.252259	-0.168902	-0.316897	-0.11199	-0.506919	0.0649194	-0.177462	-0.126338	-0.264263	-0.367369	-0.198243	-0.490423	-0.413392	-0.0027547	-0.349128	0.0941141	-0.0388711	-0.194711	-0.431728	-0.40169	0.160035	0.0533705	0.257251	-0.234165	0.230639	-0.158758	-0.227411	-0.0055212	-0.15003	-0.11358	-0.0434085	-0.161772	-0.510255	0.0300236	0.335675	0.176002	0.000613319	0.189227	-0.358217
GOBP_UREA_CYCLE	-0.358509	-0.4424	0.406477	-0.142154	0.190146	0.43686	-0.164379	-0.422958	-0.0231299	0.342101	-0.157007	0.214995	-0.156341	0.0747237	-0.406993	0.301077	0.196939	0.24146	-0.329273	-0.43428	0.31285	-0.630385	-0.357133	0.325943	-0.424157	-0.373082	-0.226439	-0.500551	-0.420297	-0.059288	0.0548943	0.677996	0.314392	0.0322945	-0.0304512	-0.506146	-0.348704	-0.0393807	-0.158858	0.0866222	0.260465	-0.185853	-0.497587	0.0160489	0.474086	0.409489	-0.491048	0.580759	-0.700468
GOBP_MITOTIC_SISTER_CHROMATID_SEGREGATION	-0.474819	-0.458362	-0.134968	-0.650426	0.238545	-0.668414	-0.628429	-0.501972	0.0134426	-0.251049	-0.336018	-0.350287	-0.134671	-0.410016	-0.473623	0.0628506	-0.328139	-0.239276	0.0707278	-0.555297	-0.100756	-0.530914	0.211042	-0.332545	-0.557654	-0.458809	0.271631	0.517767	-0.284931	-0.220664	-0.548779	0.0411359	-0.622667	-0.63007	-0.229018	0.270392	0.184145	0.34238	-0.530305	0.0114252	-0.0881227	-0.185864	-0.463934	0.416912	-0.354994	-0.495778	0.55444	-0.555439	-0.554908
GOBP_CELL_CYCLE_CHECKPOINT	-0.499658	-0.498157	-0.192871	-0.629496	0.0497542	-0.630116	-0.615281	-0.529006	-0.25367	-0.300375	-0.272803	-0.419603	-0.399178	-0.338425	-0.50846	-0.10811	-0.20364	-0.288198	0.0896969	-0.580909	-0.175991	-0.541418	-0.0250514	-0.352664	-0.547891	-0.391039	0.0595383	0.489079	-0.408827	-0.256806	-0.489753	-0.0383886	-0.570399	-0.558307	-0.0584562	0.159657	0.201842	0.29575	-0.404062	0.00487756	-0.205718	-0.261121	-0.518346	0.279307	-0.229186	-0.386557	0.426138	-0.465881	-0.528671
GOBP_DNA_REPLICATION_CHECKPOINT	-0.412928	-0.327637	-0.201846	-0.636587	0.355541	-0.81247	-0.637904	-0.470272	0.0104084	-0.349216	-0.304844	-0.409555	-0.259752	-0.286313	-0.377752	-0.0866064	-0.251268	-0.289722	0.289994	-0.608005	-0.320829	-0.563579	0.330663	-0.444108	-0.559019	-0.517138	0.178652	0.574364	-0.277007	0.0161327	-0.659482	0.172354	-0.78408	-0.691232	-0.104962	0.228342	0.263015	0.436227	-0.580678	0.278513	0.143865	-0.160876	-0.475829	0.225932	-0.560352	-0.623722	0.583945	-0.592235	-0.383584
GOBP_REGULATION_OF_TRANSCRIPTION_INVOLVED_IN_G1_S_TRANSITION_OF_MITOTIC_CELL_CYCLE	-0.500838	-0.513368	-0.190569	-0.648601	0.432348	-0.636003	-0.595307	-0.63159	-0.0804168	-0.186037	-0.189311	-0.308093	-0.379067	-0.252938	-0.472714	0.340996	-0.481314	-0.195309	-0.0578783	-0.589384	0.157644	-0.464515	-0.0159597	-0.386466	-0.522877	-0.478034	0.186613	0.420645	-0.339454	-0.22045	-0.611672	0.146565	-0.589457	-0.615726	0.106885	0.148469	-0.00929118	0.347249	-0.454017	0.306633	-0.0546087	-0.162859	-0.524901	0.234276	-0.14535	-0.444767	0.427361	-0.462928	-0.411887
GOBP_SULFUR_AMINO_ACID_METABOLIC_PROCESS	-0.575234	-0.529453	0.0160086	-0.453803	-0.0518721	-0.206299	-0.410405	-0.40619	-0.0482464	-0.088191	-0.333032	0.154424	-0.437724	0.0319708	-0.424285	-0.123444	0.124591	-0.0548233	0.0454261	-0.583073	-0.149937	-0.522884	-0.248609	0.307104	-0.321781	-0.0933433	-0.0666866	-0.0806203	-0.507445	0.160967	-0.00976241	0.102165	-0.0759326	-0.256433	0.0366234	-0.238523	0.0756247	0.311967	-0.0106237	0.0608171	0.0812788	-0.168564	-0.509709	-0.0676174	-0.104822	-0.179116	0.0174144	-0.155858	-0.461514
GOBP_SULFUR_AMINO_ACID_BIOSYNTHETIC_PROCESS	-0.614641	-0.509391	-0.240347	-0.558681	-0.173656	-0.0405843	-0.490059	-0.524564	-0.2473	-0.0817589	-0.215821	0.0161087	-0.455533	0.0212614	-0.417839	-0.352645	0.0906406	0.108924	-0.0241162	-0.610063	-0.258496	-0.483146	-0.371526	0.0831086	-0.512415	-0.0382854	0.0111139	0.20574	-0.46809	0.0558431	0.128847	-0.0799425	-0.175442	-0.423977	0.0923507	0.0176991	-0.0132155	0.213599	-0.160445	0.117128	-0.0530674	-0.146269	-0.462054	0.0354917	-0.129151	0.00015957	-0.287996	-0.340634	-0.458015
GOBP_SULFUR_AMINO_ACID_CATABOLIC_PROCESS	-0.502651	-0.444039	0.241232	-0.318873	0.230428	-0.164653	-0.434543	-0.377501	0.198873	-0.193712	-0.184568	0.0535882	-0.252824	0.0967132	-0.262796	0.0767543	0.11893	-0.106972	-0.00683637	-0.583103	0.0612976	-0.370762	0.118324	0.181694	-0.297263	0.00790134	-0.360257	0.0910631	-0.528356	0.366626	0.215135	0.223305	-0.0453824	-0.190969	-0.116299	-0.314749	0.400839	0.457828	-0.269889	-0.187884	0.0829293	-0.0558958	-0.528137	0.0360393	-0.089631	-0.372244	-0.238779	-0.276721	-0.381587
GOBP_ESTABLISHMENT_OF_MITOTIC_SPINDLE_ORIENTATION	-0.401766	-0.502944	-0.499835	-0.570694	-0.0433493	-0.484173	-0.495067	-0.419651	-0.323484	-0.444308	-0.137428	-0.463218	-0.134059	-0.416216	-0.429309	-0.284972	-0.365552	-0.182116	-0.255383	-0.540455	-0.0353265	-0.357892	-0.0480082	-0.445611	-0.53057	-0.503104	0.284185	0.351515	-0.252906	-0.0234589	-0.451381	-0.211752	-0.480739	-0.459939	-0.0338252	0.194514	-0.0426549	0.189207	-0.305545	0.23294	-0.365976	-0.293007	-0.525248	0.397347	-0.243789	-0.274163	0.439985	-0.33574	-0.297038
GOBP_RRNA_MODIFICATION	-0.611035	-0.699576	0.323458	-0.719463	-0.413947	-0.50229	-0.769169	-0.681624	0.129019	0.0958461	-0.0432474	-0.0433035	-0.604565	-0.169611	-0.652031	0.201382	0.199143	-0.20052	0.26363	-0.740197	-0.362483	-0.665595	-0.410487	0.448813	-0.644228	-0.458897	0.17043	0.259006	-0.688605	-0.324425	-0.0924137	0.221111	-0.552739	-0.685543	-0.436778	-0.388316	-0.173932	0.534844	-0.325687	-0.514678	0.210296	-0.390461	-0.631997	0.374259	-0.255831	-0.374565	0.438255	-0.524274	-0.691093
GOBP_RDNA_HETEROCHROMATIN_ASSEMBLY	-0.644359	-0.600454	-0.498343	-0.745917	-0.319948	-0.710781	-0.698743	-0.563189	-0.270709	-0.633799	-0.418735	-0.610279	-0.41634	-0.681454	-0.454331	-0.299837	-0.25695	-0.627099	0.294612	-0.66173	-0.364587	-0.603044	-0.592375	-0.292691	-0.671279	-0.155914	-0.204809	0.600379	-0.48617	-0.326958	-0.634878	-0.483256	-0.528997	-0.418769	-0.0127929	0.323328	0.453826	0.489743	-0.300986	0.129482	-0.590476	-0.128273	-0.644383	0.560608	-0.353678	-0.204373	0.306088	-0.541839	-0.635323
GOBP_NUCLEAR_TRANSCRIBED_MRNA_CATABOLIC_PROCESS_NONSENSE_MEDIATED_DECAY	-0.519754	-0.722923	0.50768	-0.551682	0.0749043	-0.00326492	-0.601516	-0.552986	0.492411	0.415006	0.23013	0.450968	-0.58843	0.385408	-0.685681	0.61422	-0.352895	0.3581	0.547027	-0.71856	0.459665	-0.73075	0.512764	0.543033	-0.598941	-0.319661	0.0490639	-0.0162717	-0.735514	-0.481371	0.202911	0.633257	0.137469	-0.598897	0.0914253	-0.552618	0.396018	0.605383	-0.522487	-0.433559	0.392983	-0.410172	-0.729269	0.259504	0.420008	-0.399488	0.696901	-0.167364	-0.758315
[truncated: 120 more columns]

## Sheet: Supplementary Table S3
Table S3. The Results of ssGSEA for Tumor Immune Infiltration Analysis
Type	TCGA.02.0047.01A	TCGA.02.2483.01A	TCGA.06.0125.01A	TCGA.06.0125.02A	TCGA.06.0174.01A	TCGA.06.0178.01A	TCGA.06.0211.01B	TCGA.06.0221.02A	TCGA.06.0646.01A	TCGA.06.0686.01A	TCGA.06.0743.01A	TCGA.06.0744.01A	TCGA.06.0745.01A	TCGA.06.0747.01A	TCGA.06.1804.01A	TCGA.06.2558.01A	TCGA.06.2559.01A	TCGA.06.2564.01A	TCGA.06.2569.01A	TCGA.06.2570.01A	TCGA.06.5411.01A	TCGA.06.5416.01A	TCGA.06.5417.01A	TCGA.06.5418.01A	TCGA.06.5856.01A	TCGA.06.5858.01A	TCGA.08.0386.01A	TCGA.12.0618.01A	TCGA.12.0821.01A	TCGA.12.1597.01B	TCGA.12.3650.01A	TCGA.12.3652.01A	TCGA.12.5299.01A	TCGA.14.0787.01A	TCGA.14.0790.01B	TCGA.14.0871.01A	TCGA.14.1034.02B	TCGA.14.1825.01A	TCGA.15.0742.01A	TCGA.19.0957.02A	TCGA.19.1390.01A	TCGA.19.2619.01A	TCGA.19.2620.01A	TCGA.19.2624.01A	TCGA.19.2625.01A	TCGA.19.5960.01A	TCGA.26.1442.01A	TCGA.26.5132.01A	TCGA.26.5133.01A
aDCs	0.529827	0.513798	0.510309	0.555278	0.513153	0.508314	0.460139	0.462036	0.629677	0.498885	0.552929	0.442046	0.572156	0.523277	0.525641	0.507939	0.480316	0.547559	0.581031	0.494848	0.517795	0.481871	0.490233	0.554281	0.529477	0.578286	0.491669	0.509559	0.522693	0.451531	0.458269	0.448819	0.557567	0.565446	0.450128	0.458569	0.58054	0.48172	0.540464	0.526815	0.42554	0.533886	0.467273	0.458967	0.536303	0.490128	0.458192	0.552266	0.540753
APC_co_inhibition	0.551884	0.56499	0.524777	0.57531	0.530144	0.585673	0.563571	0.485947	0.629003	0.554597	0.590474	0.539566	0.548138	0.535004	0.574293	0.540246	0.584029	0.655383	0.458836	0.598611	0.573064	0.443716	0.516334	0.608182	0.602102	0.634477	0.560014	0.485857	0.493243	0.576482	0.583929	0.535664	0.662298	0.633175	0.536431	0.457023	0.559134	0.540795	0.54716	0.596395	0.514817	0.532091	0.597987	0.484938	0.602476	0.521161	0.535148	0.610848	0.53457
APC_co_stimulation	0.428403	0.415518	0.392462	0.402958	0.360763	0.434954	0.39497	0.347645	0.464656	0.386582	0.422722	0.401241	0.427822	0.370113	0.377482	0.426154	0.414778	0.443551	0.355237	0.40778	0.401758	0.370047	0.360544	0.423647	0.422763	0.415247	0.370027	0.327281	0.386074	0.383556	0.390517	0.39373	0.383556	0.424924	0.359826	0.369051	0.385772	0.38386	0.399426	0.427083	0.33091	0.436494	0.387491	0.332399	0.406733	0.353539	0.339086	0.409988	0.347513
B_cells	0.371345	0.368249	0.365872	0.370303	0.381779	0.336828	0.374325	0.376777	0.367956	0.366442	0.366616	0.355668	0.376012	0.35834	0.362331	0.384584	0.361327	0.358482	0.422298	0.364311	0.357236	0.350615	0.328966	0.351437	0.350544	0.361798	0.365525	0.394828	0.405104	0.348596	0.364517	0.357505	0.327597	0.375787	0.371775	0.400487	0.29613	0.396081	0.341192	0.368062	0.337393	0.355644	0.355786	0.343978	0.372932	0.390073	0.326925	0.364525	0.373363
CCR	0.51108	0.495837	0.4959	0.520295	0.474751	0.513415	0.493148	0.447458	0.537019	0.490343	0.515322	0.489376	0.516061	0.493611	0.481156	0.49191	0.497941	0.509628	0.474671	0.501224	0.488587	0.461969	0.463482	0.528637	0.510125	0.495516	0.475233	0.46123	0.483592	0.473404	0.486478	0.496073	0.515259	0.509871	0.47729	0.476452	0.46919	0.473325	0.481648	0.491376	0.465698	0.499664	0.503714	0.4528	0.496723	0.457917	0.465369	0.495502	0.464863
CD8+_T_cells	0.371704	0.415214	0.387246	0.436449	0.414757	0.42099	0.346728	0.389158	0.359071	0.345731	0.484738	0.419203	0.457186	0.342323	0.330105	0.401167	0.398175	0.403578	0.585264	0.33343	0.462297	0.432086	0.36252	0.321586	0.383257	0.298522	0.261038	0.491844	0.375943	0.343653	0.465747	0.455981	0.32142	0.373615	0.407276	0.488229	0.340578	0.418871	0.35504	0.424938	0.310698	0.374737	0.368545	0.422694	0.301265	0.345897	0.332433	0.435286	0.614894
Check-point	0.449057	0.445811	0.42167	0.437835	0.409394	0.458353	0.420844	0.387292	0.47909	0.42616	0.450016	0.43189	0.443859	0.404236	0.416893	0.433986	0.441262	0.455577	0.411211	0.442188	0.430234	0.387022	0.400256	0.443044	0.446135	0.446173	0.40688	0.391627	0.40657	0.416834	0.448458	0.408086	0.44026	0.437925	0.402036	0.405248	0.395984	0.410391	0.411166	0.451615	0.397198	0.4123	0.411524	0.404084	0.428048	0.389217	0.400897	0.438111	0.412088
Cytolytic_activity	0.313817	0.479408	0.344781	0.376064	0.354579	0.408831	0.47254	0.321553	0.369352	0.392204	0.462746	0.404684	0.426419	0.289863	0.334199	0.420275	0.361019	0.398562	0.371767	0.39733	0.358508	0.341612	0.325056	0.380336	0.43711	0.317051	0.289346	0.274074	0.360487	0.316946	0.364628	0.391486	0.361418	0.432887	0.406194	0.36857	0.307029	0.338401	0.373372	0.374422	0.201865	0.379175	0.268531	0.329554	0.331055	0.343148	0.286613	0.423027	0.386533
DCs	0.2566	0.269547	0.237315	0.287273	0.195837	0.292394	0.276379	0.288682	0.178518	0.302171	0.320003	0.224658	0.247098	0.199566	0.155399	0.176109	0.257176	0.253789	0.179808	0.204488	0.288841	0.244016	0.297486	0.262406	0.280034	0.222377	0.23059	0.274536	0.180875	0.158612	0.253211	0.263373	0.29378	0.324261	0.204451	0.260069	0.208202	0.2307	0.274238	0.25724	0.26442	0.231775	0.234036	0.159556	0.198206	0.23555	0.216577	0.270948	0.271848
HLA	0.781688	0.787668	0.680094	0.737464	0.679116	0.781538	0.762723	0.655766	0.73877	0.755252	0.79689	0.75449	0.789193	0.718473	0.712896	0.739168	0.721761	0.713083	0.578908	0.738652	0.714712	0.690458	0.686701	0.712708	0.746909	0.772487	0.65412	0.683468	0.67953	0.718297	0.766709	0.727062	0.7807	0.752983	0.703054	0.666582	0.649921	0.708242	0.708899	0.770329	0.644654	0.688649	0.737647	0.634456	0.67152	0.679439	0.690297	0.756009	0.712246
iDCs	0.118574	0.134605	0.261911	0.327817	0.142375	0.141053	0.177516	0.0686338	0.028426	0.305292	0.214402	0.116966	0.162751	0.0368623	0.0543096	0.0871325	0.11397	0.105321	0.0901941	0.106365	0.199592	0.369441	0.104187	0.142364	0.132222	0.100872	0.0284883	0.198389	0.34607	0.105183	0.167235	0.16377	0.0590753	0.177982	0.0608208	0.106888	0.0903148	0.222899	0.0864189	0.0795221	0.0561272	0.102143	0.110255	0.0232312	0.0333299	0.0886814	0.0820137	0.271048	0.144153
Inflammation-promoting	0.409223	0.449614	0.400115	0.4475	0.389533	0.462504	0.441669	0.370488	0.437724	0.40457	0.459541	0.432174	0.440095	0.416141	0.424385	0.413725	0.421109	0.410181	0.328476	0.437539	0.398561	0.412346	0.394682	0.443494	0.466673	0.394818	0.35916	0.382439	0.404921	0.403941	0.440114	0.472765	0.483416	0.452615	0.476995	0.385092	0.389954	0.406309	0.418727	0.43018	0.407846	0.425174	0.386958	0.392691	0.415447	0.370116	0.367168	0.453266	0.393182
Macrophages	0.689858	0.647266	0.607698	0.665077	0.64219	0.664056	0.627844	0.553238	0.668952	0.67962	0.611637	0.562671	0.661425	0.573751	0.577131	0.656096	0.647999	0.639101	0.491327	0.641549	0.637972	0.567478	0.562865	0.670199	0.64882	0.667942	0.591377	0.569358	0.642266	0.608871	0.630462	0.555439	0.626996	0.665353	0.505684	0.556993	0.580607	0.595678	0.579242	0.650756	0.574616	0.570964	0.59599	0.552645	0.58644	0.522811	0.512679	0.623277	0.558047
Mast_cells	0.148314	0.15912	0.105672	0.155058	0.0609454	0.11427	0.0577247	0.252001	0.300305	0.156615	0.289028	0.151558	0.353506	0.0302973	0.0814376	0.203	0.228064	0.124965	0.0991355	0.125982	0.0974635	0.158387	0.134712	0.0332147	0.138567	0.162091	0.333418	0.061392	0.33002	0.0428429	0.0955636	0.0593609	0.209022	0.176145	0.00858182	0.0214026	0.048945	0.0689279	0.00812467	0.273944	0.071802	0.139687	0.12613	0.188887	0.00193247	0.0231517	0.310578	0.254357	0.252623
MHC_class_I	0.955797	0.964455	0.937513	0.965471	0.938577	0.958789	0.968632	0.911985	0.978713	0.939807	0.954068	0.972203	0.975361	0.975258	0.944979	0.938735	0.952083	0.967611	0.843754	0.95006	0.94917	0.978373	0.938061	0.974565	0.935467	0.978387	0.969094	0.913304	0.968935	0.935654	0.976861	0.993897	0.994017	0.978526	0.990251	0.913816	0.974228	0.933593	0.97052	0.953632	0.966321	0.981241	0.964508	0.922143	0.974261	0.88058	0.955508	0.986444	0.966403
Neutrophils	0.597804	0.59761	0.527115	0.573842	0.552946	0.556607	0.532888	0.559244	0.623824	0.536286	0.543384	0.498311	0.562541	0.53437	0.576769	0.575169	0.560669	0.579136	0.517158	0.594466	0.57053	0.525962	0.549099	0.585968	0.572338	0.585253	0.547735	0.532933	0.533377	0.56278	0.515577	0.494536	0.561075	0.562905	0.503563	0.502399	0.534662	0.530074	0.512734	0.589659	0.579754	0.562981	0.557009	0.513247	0.522537	0.53038	0.542349	0.559197	0.525346
NK_cells	0.238847	0.285785	0.137666	0.0893071	0.144833	0.324334	0.187193	0.228675	0.200879	0.191343	0.198608	0.210132	0.266289	0.0932301	0.182473	0.288897	0.121358	0.185538	0.152878	0.211203	0.28009	0.533365	0.1547	0.178387	0.206645	0.086487	0.127103	0.199073	0.196463	0.210794	0.255164	0.11921	0.168645	0.235445	0.219813	0.199264	0.185594	0.255651	0.119223	0.192912	0.235234	0.0893306	0.134675	0.153697	0.183076	0.151642	0.213279	0.127026	0.325539
Parainflammation	0.693098	0.67944	0.65438	0.708078	0.660007	0.68503	0.664104	0.602163	0.740517	0.677491	0.699657	0.666393	0.669861	0.69574	0.705475	0.667216	0.702917	0.677629	0.607547	0.659769	0.681647	0.642093	0.632099	0.680227	0.700632	0.709612	0.649952	0.6186	0.662125	0.641954	0.653098	0.708222	0.747739	0.702249	0.701986	0.668162	0.665574	0.644823	0.697694	0.723233	0.636508	0.661024	0.667419	0.623549	0.693308	0.629367	0.618942	0.720519	0.632719
pDCs	0.427681	0.432986	0.39742	0.412804	0.420973	0.533942	0.472189	0.402249	0.464795	0.468267	0.496852	0.476695	0.462679	0.475655	0.488408	0.450022	0.439152	0.50337	0.396882	0.474484	0.4582	0.376003	0.392048	0.463296	0.465256	0.472563	0.414507	0.415267	0.42507	0.469523	0.483035	0.429102	0.44494	0.4922	0.416998	0.362563	0.403681	0.422926	0.428149	0.435841	0.406873	0.414279	0.446934	0.403193	0.407228	0.410468	0.454542	0.473767	0.41411
T_cell_co-inhibition	0.46318	0.432667	0.424171	0.45131	0.37828	0.468144	0.407277	0.371883	0.486493	0.406112	0.44555	0.413153	0.423027	0.395418	0.408719	0.435657	0.450792	0.477083	0.387935	0.451842	0.432665	0.356397	0.403819	0.456588	0.471811	0.446679	0.395554	0.376593	0.406901	0.403834	0.435287	0.37415	0.446939	0.454487	0.370369	0.339779	0.373201	0.392014	0.397726	0.464483	0.388807	0.37105	0.425609	0.385862	0.42458	0.405236	0.42293	0.442176	0.38597
T_cell_co-stimulation	0.3277	0.356205	0.317877	0.338234	0.30016	0.340941	0.330794	0.287008	0.388887	0.305523	0.389697	0.341364	0.359006	0.307116	0.310449	0.329632	0.328797	0.354225	0.316291	0.321206	0.308043	0.275097	0.259291	0.330073	0.319271	0.310666	0.286987	0.287028	0.30272	0.279276	0.357227	0.315451	0.310723	0.353305	0.308604	0.337878	0.279653	0.300349	0.321532	0.351847	0.287303	0.314019	0.301588	0.302757	0.321407	0.289235	0.2826	0.357644	0.307324
T_helper_cells	0.910196	0.868722	0.736156	0.876701	0.816776	0.895152	0.812288	0.75415	0.939452	0.871008	0.822968	0.812122	0.892659	0.724188	0.796455	0.86573	0.761672	0.894654	0.586261	0.931598	0.887547	0.628815	0.741102	0.878114	0.891745	0.901885	0.74879	0.719658	0.767033	0.86519	0.820724	0.641116	0.881646	0.888254	0.698963	0.675276	0.661271	0.808257	0.717622	0.893158	0.756602	0.769111	0.792424	0.614187	0.802439	0.688657	0.857169	0.85958	0.7827
Tfh	0.310613	0.27153	0.255475	0.294484	0.218792	0.246292	0.215964	0.184828	0.276356	0.343272	0.3149	0.256737	0.269084	0.264343	0.280188	0.220615	0.312864	0.257372	0.145117	0.19622	0.178542	0.28358	0.272929	0.351439	0.246866	0.262418	0.306135	0.285661	0.334974	0.345001	0.347651	0.356394	0.216875	0.228791	0.268347	0.311881	0.180994	0.34969	0.283789	0.260393	0.248888	0.182967	0.193665	0.273553	0.367847	0.320654	0.155074	0.36995	0.218219
Th1_cells	0.337453	0.2879	0.277356	0.30925	0.268694	0.34465	0.286986	0.334857	0.306843	0.314261	0.360026	0.322855	0.273545	0.27347	0.362001	0.337216	0.324638	0.295741	0.2798	0.290284	0.322426	0.295758	0.288667	0.258265	0.383153	0.319841	0.330456	0.341027	0.314142	0.284315	0.293672	0.256081	0.277551	0.270208	0.372864	0.266774	0.245161	0.311158	0.280412	0.324815	0.303788	0.292702	0.243054	0.315591	0.283746	0.314965	0.366659	0.358707	0.267755
Th2_cells	0.352657	0.382943	0.359857	0.370289	0.321149	0.37647	0.329619	0.319255	0.362243	0.393469	0.367352	0.325043	0.394374	0.322581	0.344326	0.327248	0.367174	0.35504	0.387831	0.313784	0.362429	0.378669	0.355779	0.384569	0.370333	0.362256	0.344206	0.364245	0.357398	0.3473	0.346623	0.354364	0.356583	0.347371	0.364659	0.378723	0.319054	0.337836	0.352258	0.369952	0.340133	0.338961	0.369376	0.368627	0.383089	0.41134	0.31144	0.392915	0.336724
TIL	0.528536	0.513949	0.457909	0.499	0.455647	0.519963	0.480666	0.462207	0.527576	0.485511	0.508295	0.48298	0.512512	0.445524	0.484447	0.504723	0.483113	0.51523	0.443439	0.517529	0.504515	0.443153	0.449691	0.502834	0.50467	0.50721	0.446785	0.437239	0.45251	0.48292	0.492819	0.45423	0.48429	0.506968	0.450867	0.438422	0.418518	0.452151	0.450043	0.515965	0.459641	0.452304	0.477692	0.418009	0.450314	0.443767	0.481871	0.494927	0.461349
Treg	0.664415	0.64322	0.679429	0.686803	0.648256	0.64813	0.668109	0.635365	0.665754	0.639437	0.652929	0.641823	0.661916	0.669869	0.635328	0.653256	0.660522	0.688746	0.627327	0.65081	0.650868	0.645855	0.653281	0.674527	0.65893	0.676046	0.640817	0.635699	0.653179	0.6385	0.652021	0.656954	0.680204	0.671135	0.657466	0.636175	0.660854	0.642461	0.65407	0.661314	0.631917	0.670937	0.666092	0.634734	0.653008	0.651913	0.64879	0.650645	0.65696
Type_I_IFN_Reponse	0.608068	0.588812	0.504436	0.607228	0.554885	0.597079	0.540458	0.613203	0.646397	0.585101	0.594883	0.607648	0.546628	0.676557	0.739391	0.573508	0.650461	0.521704	0.61576	0.568451	0.606438	0.567463	0.58348	0.544743	0.610702	0.662048	0.546224	0.531388	0.546845	0.558571	0.543926	0.701335	0.696806	0.569573	0.707229	0.618439	0.661706	0.539017	0.635135	0.678067	0.575905	0.530064	0.558937	0.559465	0.574396	0.529684	0.613234	0.676918	0.530142
Type_II_IFN_Reponse	0.556583	0.500378	0.451769	0.543336	0.512915	0.490228	0.510218	0.493203	0.410123	0.499945	0.455279	0.421502	0.535855	0.534068	0.369592	0.520292	0.444423	0.496967	0.465175	0.393253	0.480251	0.518521	0.386026	0.543941	0.475612	0.480385	0.424854	0.489302	0.559849	0.478913	0.54103	0.439259	0.538944	0.515841	0.439428	0.287061	0.414137	0.465141	0.40369	0.500621	0.506841	0.490081	0.403123	0.502471	0.464515	0.366579	0.418073	0.458938	0.593101
[truncated: 120 more columns]

## Sheet: Supplementary Table S4
Table S4. Mass spectrometry result of proteins related to PDIA3P1
Gene Symbol	sense	antisense
ABCE1	High	Peak Found
ACTA1	High	Peak Found
ACTB	High	Not Found
ACTG1	High	Not Found
ALDH3A1	High	Peak Found
ALDH3A2	High	Peak Found
ALDH9A1	High	Peak Found
ANLN	High	Not Found
AP1G1	High	Peak Found
ASCC3	High	Not Found
ATP6	High	Peak Found
CAPG	High	Peak Found
CAPN2	High	Peak Found
CC2D1A	High	Not Found
CCAR2; KIAA1967	High	Peak Found
C/EBPβ	High	Not Found
CLIC1	High	Peak Found
DDB1	High	Peak Found
DOCK7	High	Peak Found
DSC3	High	Peak Found
DUS3L	High	Not Found
ECH1	High	Peak Found
EHD4	High	Peak Found
EIF1AX	High	Peak Found
EIF4E	High	Peak Found
FAM129B	High	Not Found
FKBP3	High	Peak Found
FLII	High	Not Found
FMR1	High	Peak Found
FUT8	High	Peak Found
G3BP2	High	Peak Found
GAPVD1	High	Not Found
GART	High	Peak Found
GGH	High	Not Found
GLG1	High	Peak Found
GNAO1	High	Not Found
GOT1	High	Peak Found
HIST1H1D	High	Peak Found
HMGB1	High	Peak Found
HNRNPF	High	Peak Found
HNRNPLL; HNRPLL	High	Not Found
HTATIP2	High	Not Found
IMPA2	High	Peak Found
IPO9	High	Peak Found
KHDRBS3	High	Peak Found
KRT38	High	Peak Found
KRT76	High	Peak Found
LARP4	High	Peak Found
LGALS3	High	Peak Found
LLGL1	High	Peak Found
LOR	High	Not Found
MAP2	High	Peak Found
MCM5	High	Peak Found
MCMBP	High	Peak Found
MCTS1	High	Peak Found
MLLT4; AFDN	High	Peak Found
MSH2	High	Peak Found
MYO18A	High	Peak Found
NAA15	High	Peak Found
NCBP1	High	Peak Found
NDUFS8	High	Peak Found
NSUN5	High	Not Found
NUFIP2	High	Peak Found
NUSAP1	High	Not Found
NXF1	High	Peak Found
OXCT1	High	Peak Found
P4HB	High	Peak Found
PARP12	High	Peak Found
PARP9	High	Peak Found
PAWR	High	Not Found
PDIA3	High	Not Found
PDIA4	High	Peak Found
PFKL	High	Peak Found
PLOD1	High	Peak Found
PM20D1	High	Peak Found
PNP	High	Not Found
PPP1CB	High	Peak Found
PRRC2C	High	Peak Found
PRSS3	High	Peak Found
QKI	High	Peak Found
QSOX1	High	Peak Found
RAB14	High	Not Found
RAF1	High	Peak Found
RER1	High	Peak Found
RPN2	High	Peak Found
RTCA	High	Peak Found
S100A14	High	Not Found
S100P	High	Peak Found
SARS	High	Peak Found
SART3	High	Peak Found
SEL1L	High	Not Found
SERPINB1	High	Peak Found
SIPA1L3	High	Peak Found
SNRPB2	High	Peak Found
SOD1	High	Not Found
SPTBN1	High	Peak Found
SRBD1	High	Peak Found
ST13P4	High	Peak Found
SYNGR3	High	Peak Found
TALDO1	High	Peak Found
TCEB1; ELOC	High	Not Found
TFRC	High	Peak Found
TIMM50	High	Peak Found
TMED10	High	Peak Found
TMEM109	High	Peak Found
TUBAL3	High	Peak Found
TUFM	High	Peak Found
USP14	High	Not Found
XRCC5	High	Peak Found
YARS	High	Not Found
YTHDF3	High	Peak Found
YWHAQ	High	Peak Found
